# Supplementary material for: Alteration of Gene Expression in Pathological Keratinization of the Ocular Surface
Source: PubMed Central journal article supplement — Invest Ophthalmol Vis Sci. 2024 Jun 27;65(6):37. doi: 10.1167/iovs.65.6.37 (PMC11216254; doi:10.1167/iovs.65.6.37), 2024-06-27
Supplement: iovs-65-6-37_s001.pdf [file iovs-65-6-37_s001.pdf]

**SUPPLEMENTARY FIGURE S1.**

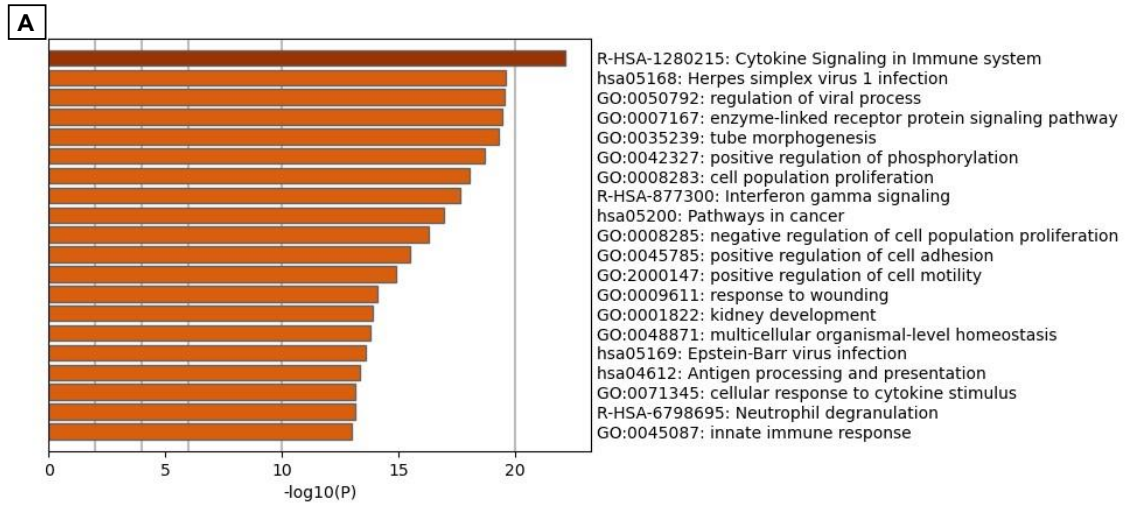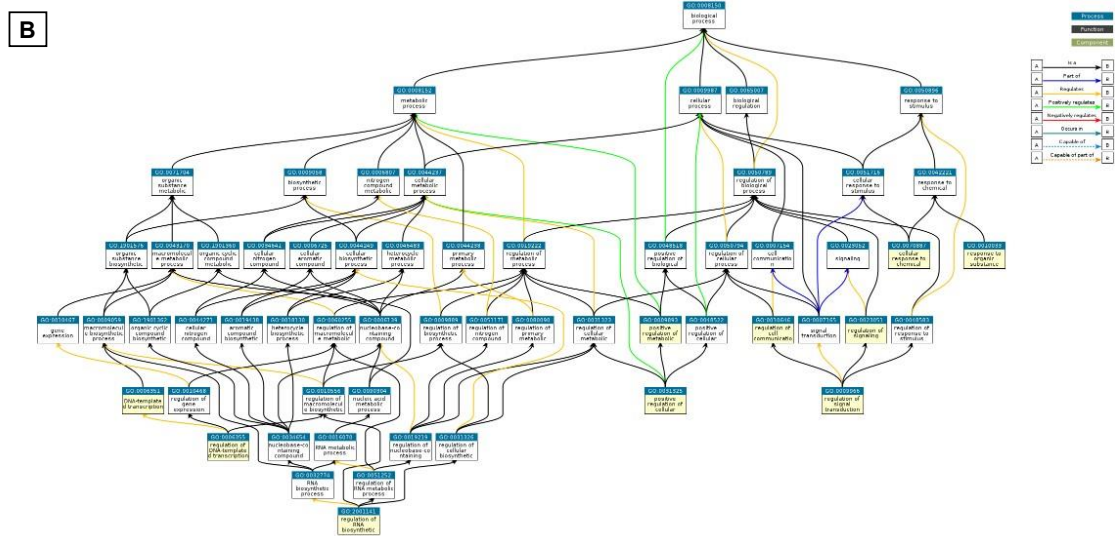

C

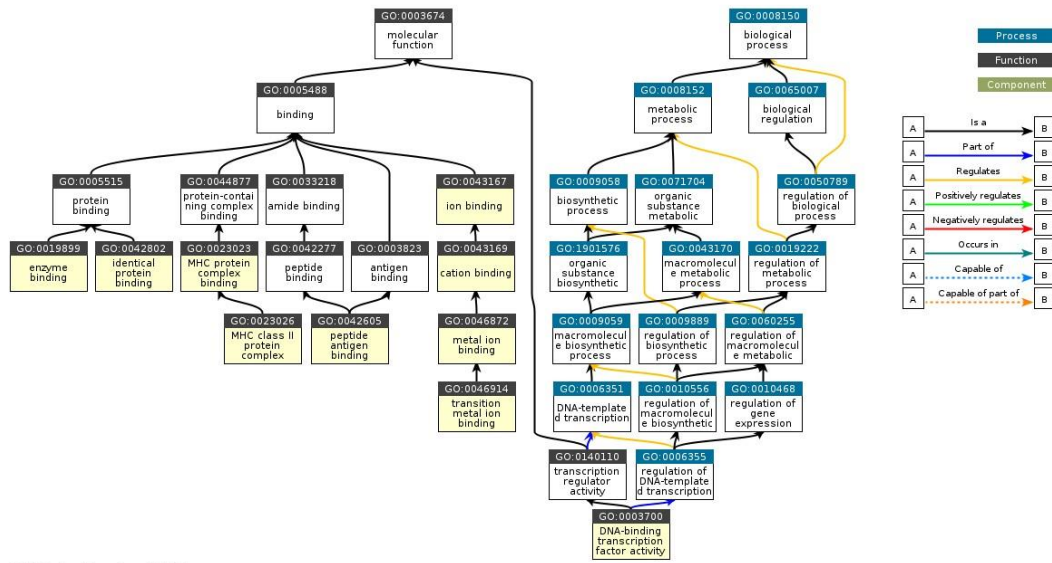

**SUPPLEMENTARY FIGURE S1.** The results of comprehensive gene expression analysis. Genes significantly upregulated in pathological keratosis cases were analyzed using Metascape [ $P$  - value (ANOVA),  $FDR < 0.05$ , Fold Change  $< -2$ ]. In Metascape, we first identified all statistically enriched terms (i.e., GO/KEGG terms, canonical pathways, hallmark gene sets, etc., based on default selections in Express Analysis), calculated cumulative hypergeometric. The cumulative  $P$  values and enrichment factors were computed and used for filtering. The remaining significant terms were clustered hierarchically in a tree based on kappa statistical similarity between gene members. A kappa score of 0.3 was then applied as a threshold to classify the tree into term clusters (A). Genes significantly upregulated in pathological keratosis cases were analyzed using Metascape ( $P$ -value (ANOVA),  $FDR < 0.05$ , Fold Change  $< -2$ ). In the biological process and molecular function, GO terms for the top 10 categories of  $P$ -values in enrichment analysis were obtained using DAVID, and charts were created. QuickGO was used for charting (B and C).

**SUPPLEMENTARY TABLE S1.** List of Primers Used in this Study

| <b>Gene<br/>Symbol</b> | <b>Forward Primer</b>         | <b>Reverse Primer</b>         |
|------------------------|-------------------------------|-------------------------------|
| AKR1B1<br>0            | GTGACACCAGCACGCATTG           | GCATTGAAGGGATAGTCTTC<br>CAA   |
| AKR1B1<br>5            | ACAGGGATTCAAGACTGGGG          | CCTCCCAGGCATCCAAGAAC          |
| CRABP2                 | AGTGTCCAGTGCTCCAGCCTA         | CTGCAGCCACAGCAATCTTC          |
| RARA                   | AATGAAGATTACTGACCTGCGA<br>AG  | CTGTCCGCTCAGAGTGTCCA          |
| RARB                   | CTGCCTGGACATCCTGATTCTT<br>A   | GGCAAAGGTGAACACAAGG<br>TC     |
| RARG                   | CCAGCCAGCCCTACATGTTC          | TCATCCTCAAACATTTTCAGG<br>GTTC |
| RARRE<br>S3            | CCCAGCTGAGATATGGCAAG          | GCAACAACCAGGATTCCAAG          |
| RDH12                  | ACAATGCGGGAGTAATGATGTG        | GGGCAGACACCTTTAGCCG           |
| 18S                    | TGAACAGACAGAAGGATGTAA<br>AGGA | AGGTCTTCACGGAGCTTGTT<br>G     |

The primers used for quantitative real-time polymerase chain reaction are listed in the table.
